# Supplementary material for: Burial Environment Drives Seed Mortality of Kochia (Bassia scoparia), Wild Oat (Avena fatua), and Volunteer Canola (Brassica napus) Irrespective of Crop Species
Source: MDPI journal article supplement (doi:10.3390/plants10091961), 2021-09-20
Supplement: s1 [file s1]

**Table S1.** Methods used to assess soil edaphic factors.

| Measurement        | Extraction Method            | Detection Method                              |
|--------------------|------------------------------|-----------------------------------------------|
| Soil Texture       | Sodium Hexametaphosphate     | Hydrometer, 6 hrs with Gravimetric Sand Sieve |
| Organic Matter     | N/A                          | Loss on Ignition at 375°C for 16 hrs          |
| pH, EC             | 1:2 Soil:Water               | Probe                                         |
| NO <sub>3</sub> -N | 0.01 M CaCl <sub>2</sub>     | Cd Reduction on Auto Flow Colorimetry         |
| P                  | Modified Kelowna             | Auto Flow Colorimetry                         |
| SO <sub>4</sub> -S | 0.01 M CaCl <sub>2</sub>     | ICP-OES <sup>a</sup>                          |
| K                  | 1 N Neutral Ammonium Acetate | Atomic Absorption                             |

<sup>a</sup> Inductively coupled plasma with optical emission spectroscopy.
